# Supplementary material for: A hemicellulose-first approach: one-step conversion of sugarcane bagasse to xylooligosaccharides over activated carbon modified with tandem plasma and acid treatments
Source: Royal Society of Chemistry journal article supplement (doi:10.1039/d2gc01303g), 2022-01-01
Supplement: d2gc01303g1.pdf [file d2gc01303g1.pdf]

## A Hemicellulose-First Approach: One-Step Conversion of Sugarcane Bagasse to Xylooligosaccharides over Activated Carbon Modified with Tandem Plasma and Acid Treatments

Shahrooz Rahmati<sup>abc\*</sup>, Luqman Atanda<sup>b\*</sup>, Michael Horn<sup>a</sup>, Athukoralalage Don K. Deshan<sup>b</sup>, Javier Jimenez Forero<sup>b</sup>, Lalehvash Moghaddam<sup>b</sup>, Deepak Dubal<sup>ac</sup>, Kostya (Ken) Ostrikov<sup>abc</sup>, and William o.s. Doherty<sup>b\*</sup>

<sup>a</sup> School of Chemistry and Physics, Queensland University of Technology (QUT), Brisbane 4000, Australia

<sup>b</sup> Centre for Agriculture and the Bioeconomy, Institute for Future Environments, Queensland University of Technology (QUT), Brisbane 4000, Australia

<sup>c</sup> Centre for Materials Science, Queensland University of Technology (QUT), 2 George Street, Brisbane 4000, Australia

\*Corresponding author:

Prof. William Doherty: [w.doherty@qut.edu.au](mailto:w.doherty@qut.edu.au)

Shahrooz Rahmati (PhD): [shahrooz.rahmati@hdr.qut.edu.au](mailto:shahrooz.rahmati@hdr.qut.edu.au)

Dr. Luqman Atanda: [luqman.atanda@qut.edu.au](mailto:luqman.atanda@qut.edu.au)

### Surface area measurements

As can be seen from Fig. S1, the curves exhibit a combination of types I and IV isotherms according to the IUPAC classification [1].

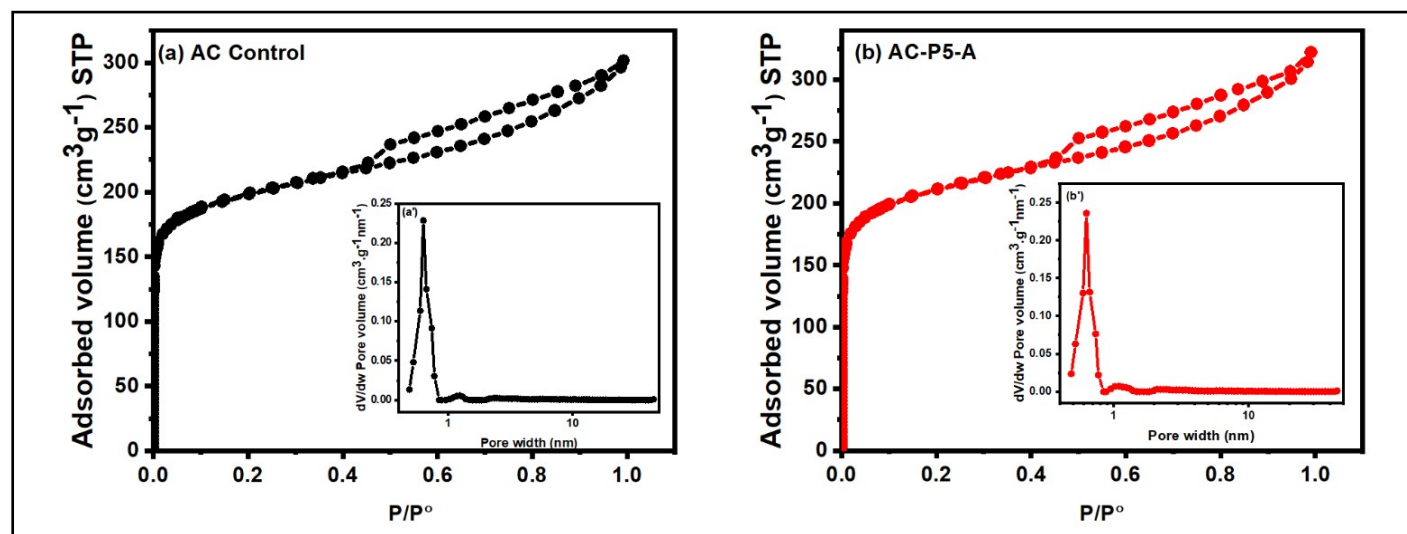

Fig. S1 N<sub>2</sub> adsorption isotherms of AC Control and AC-P5-A.

## XPS analysis

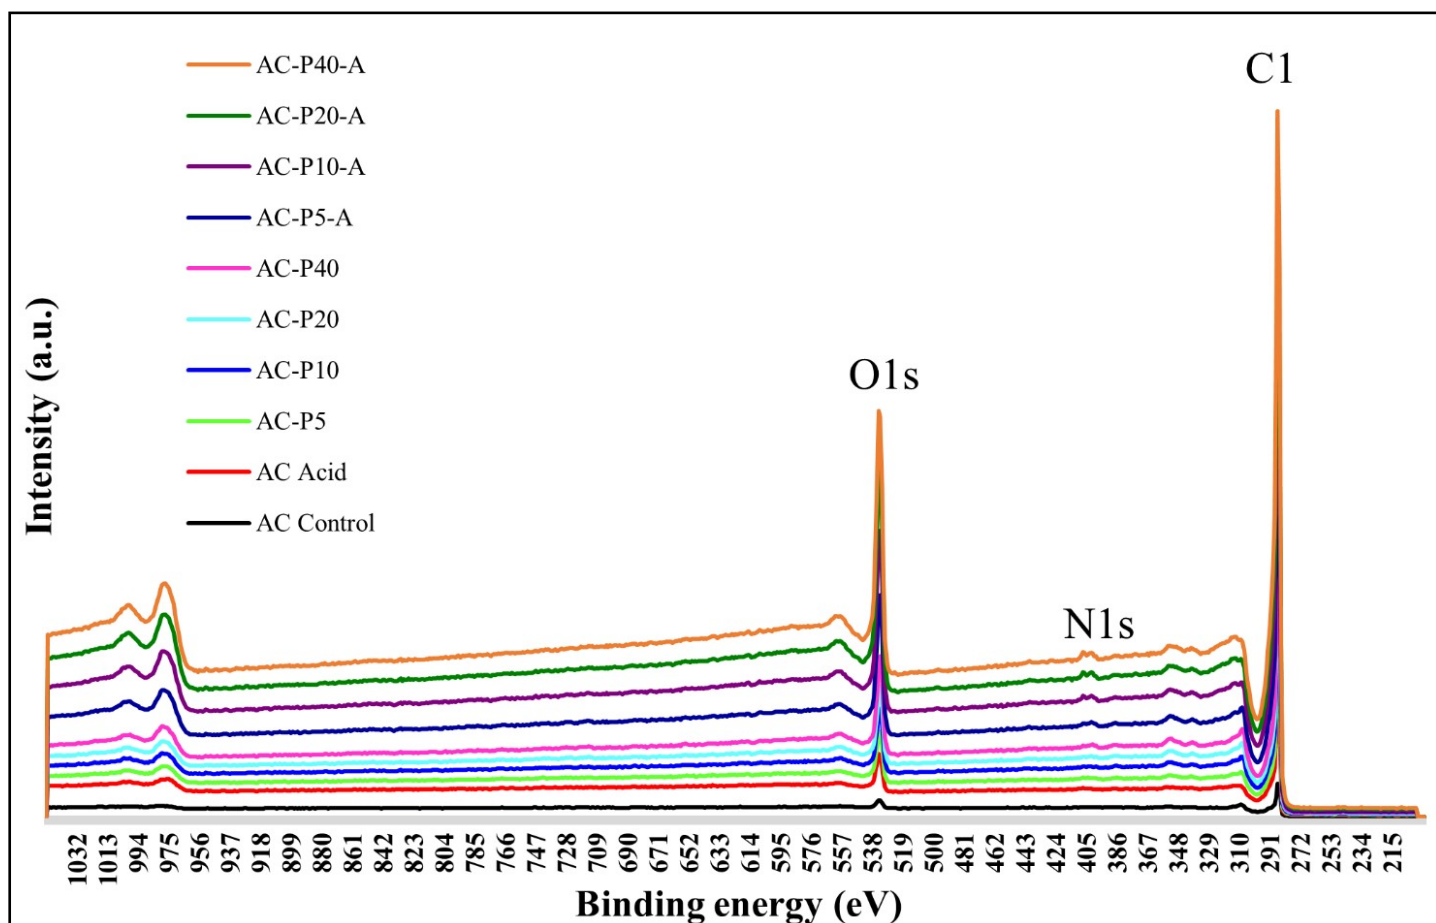

**Fig. S2** showed that the main elements of each sorbent were carbon and oxygen at the peaks of  $\sim 285$  eV (C1s) and  $\sim 533$  eV (O1s), with having some samples with  $\sim 400$  eV (N1s).

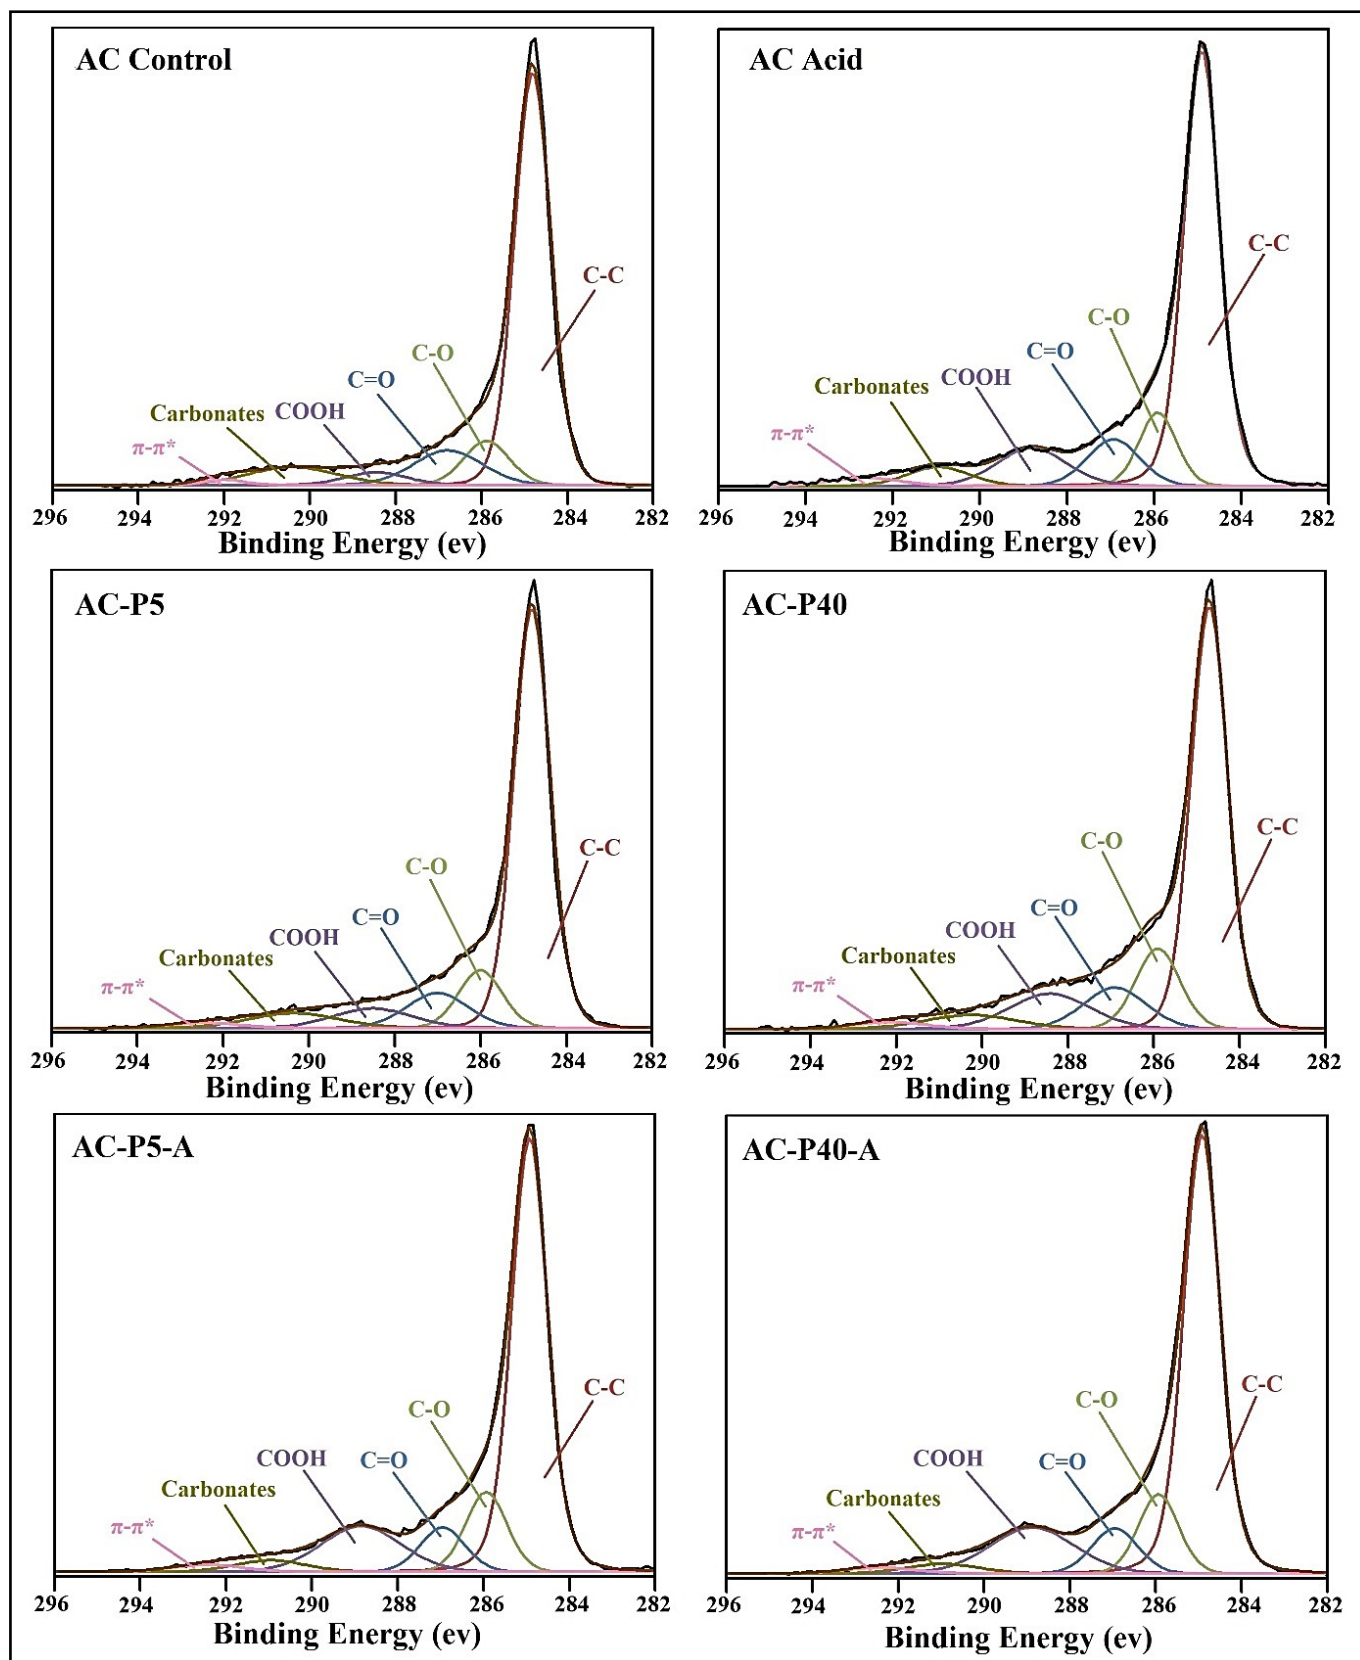

Fig. S3 XPS spectra of the high-resolution scan of C1s for different catalyst.

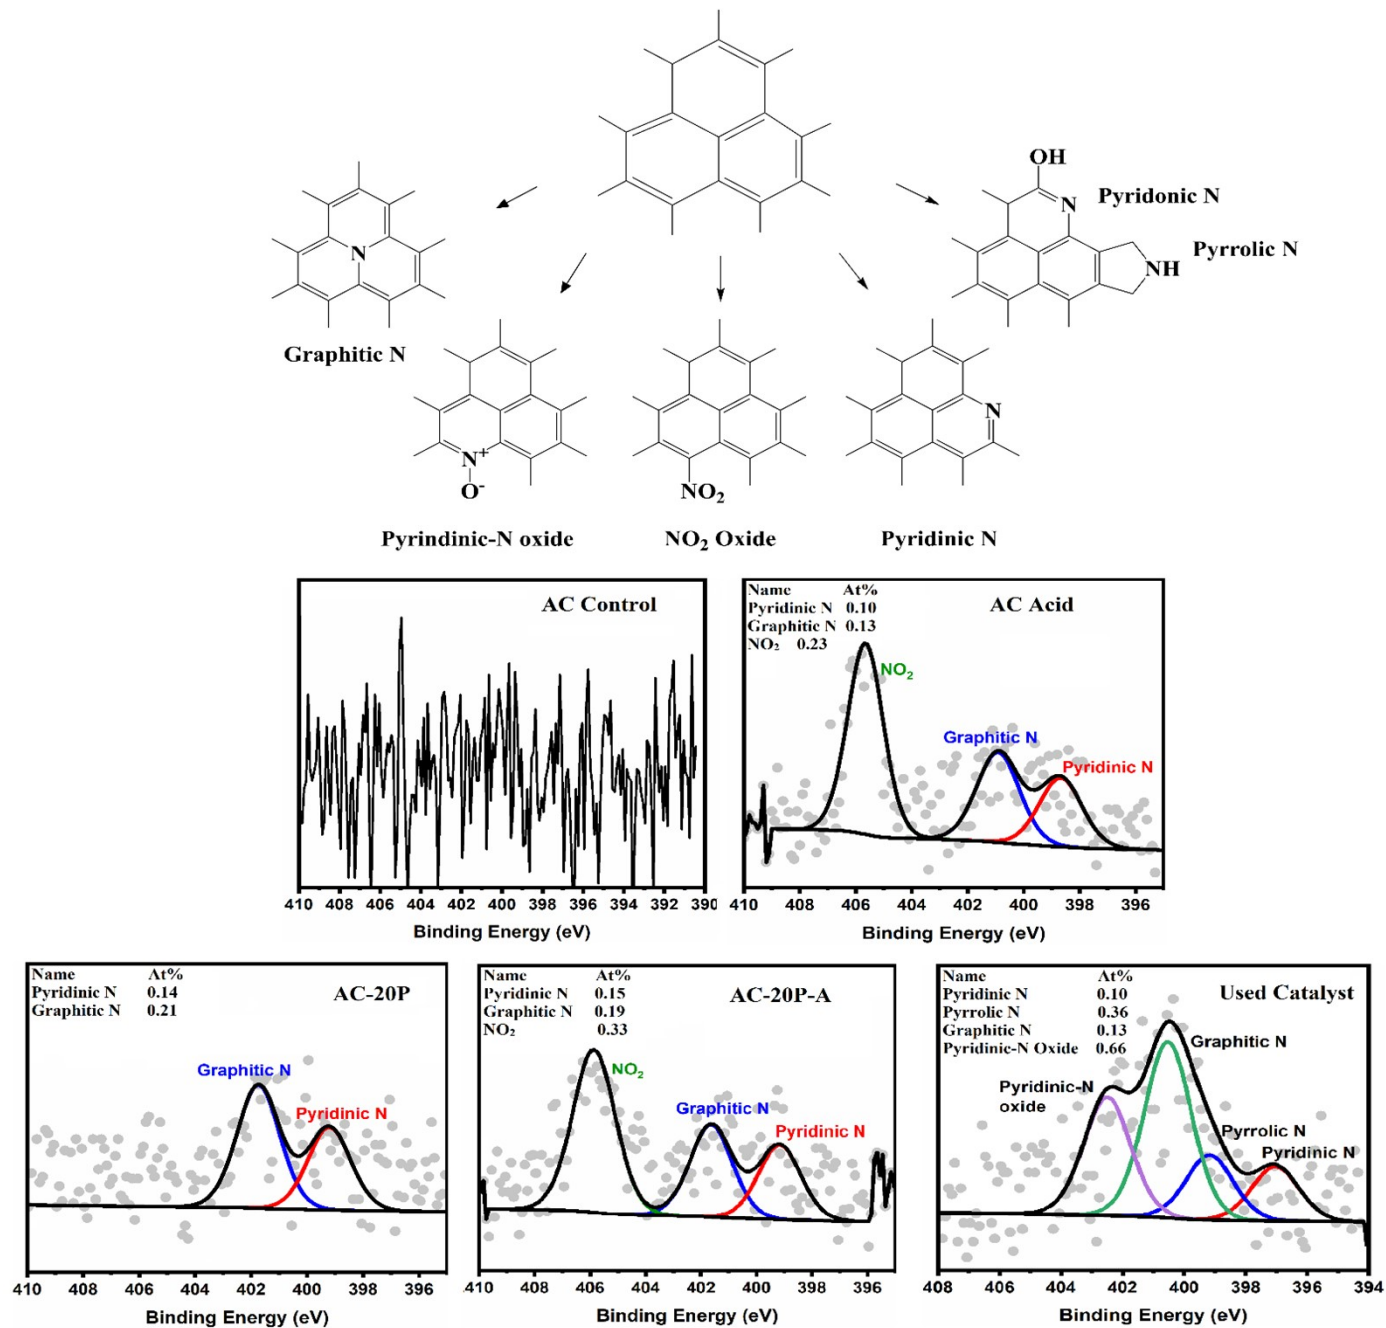

Fig. S4 XPS spectra of the high-resolution scan of N1s of different catalysts.



## SEM analysis

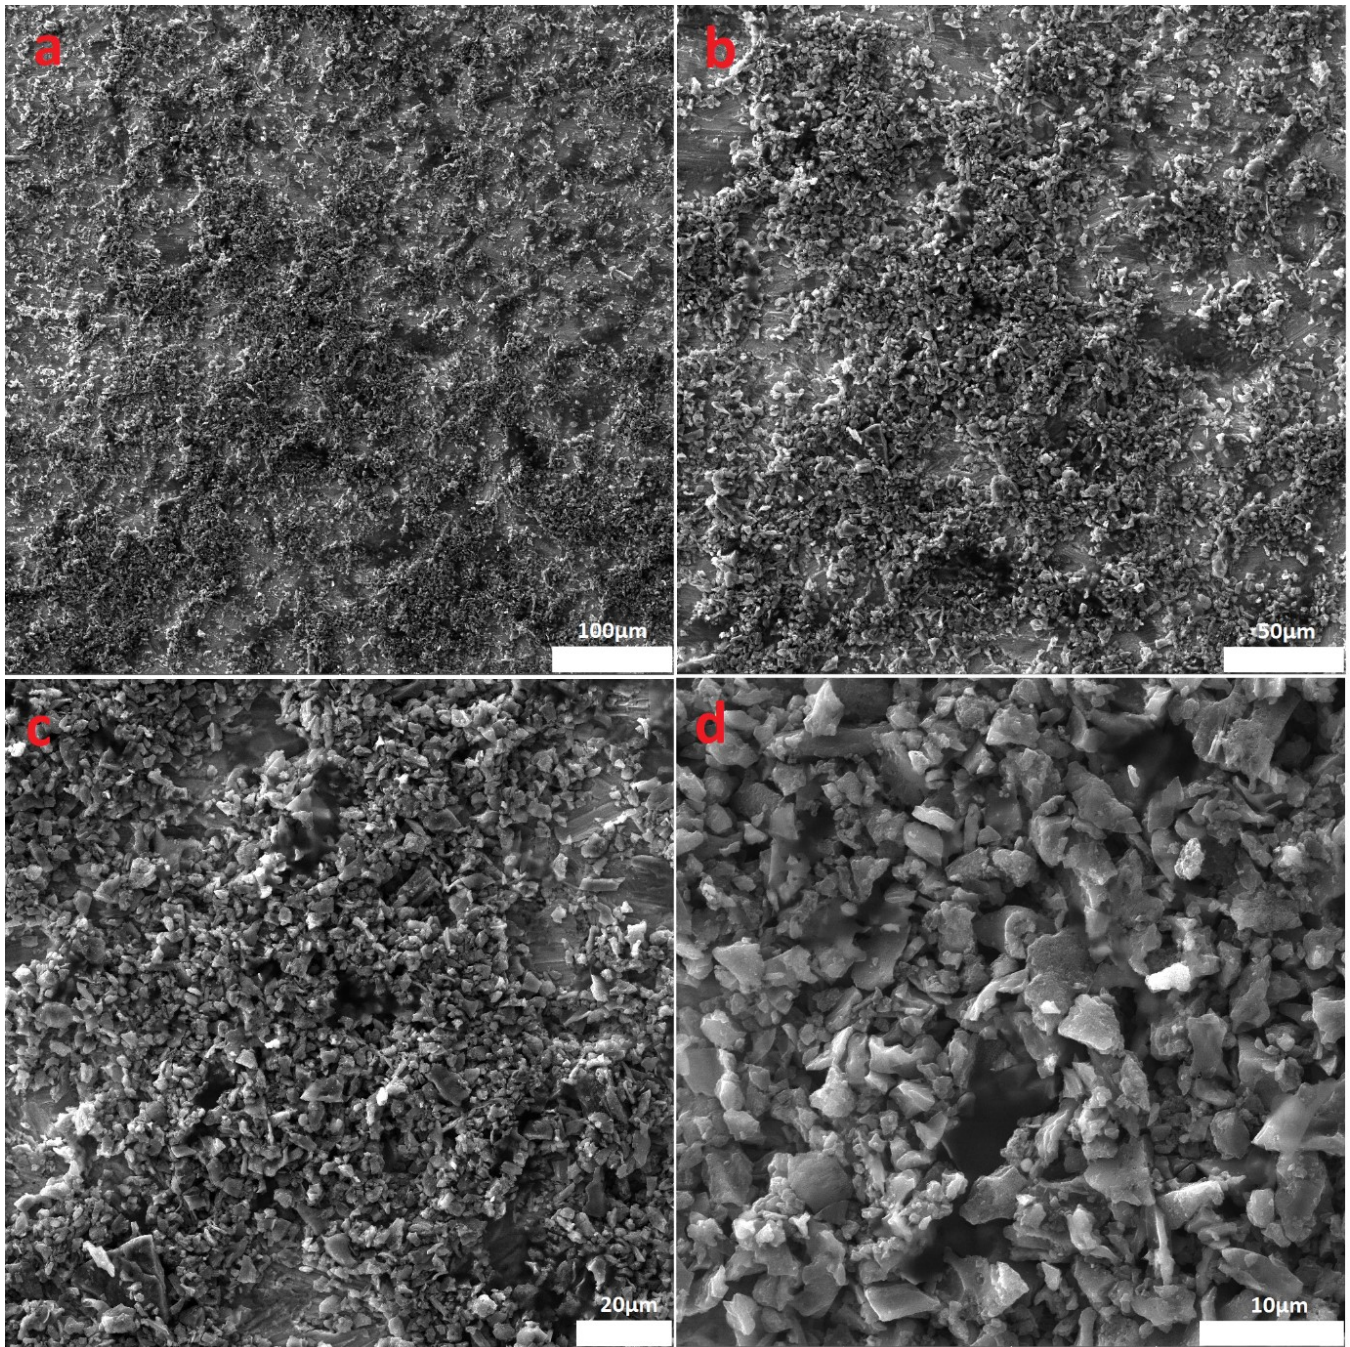

**Fig. S5** SEM of submicrometer particles collected after acid treatment. (a) 100  $\mu\text{m}$ , (b) 50  $\mu\text{m}$ , (c) 20  $\mu\text{m}$ , and (d) 10  $\mu\text{m}$ ,.



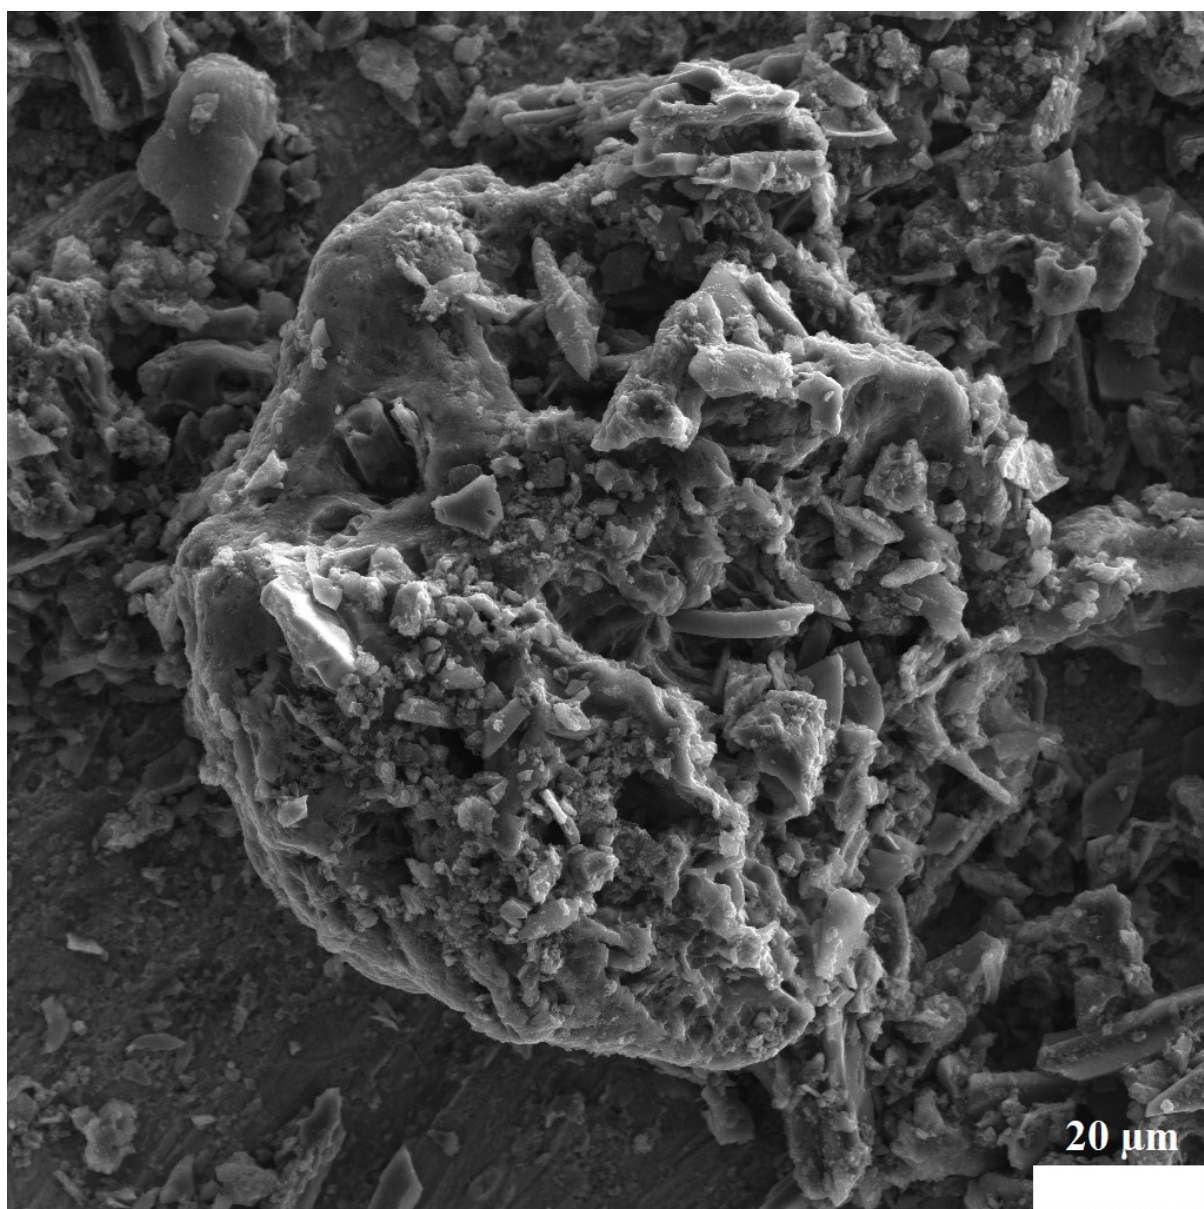

**Fig. S6** The SEM of catalyst derived from acid treatment followed by plasma irradiation of AC - AC-A-5P.

## Calibration Curve

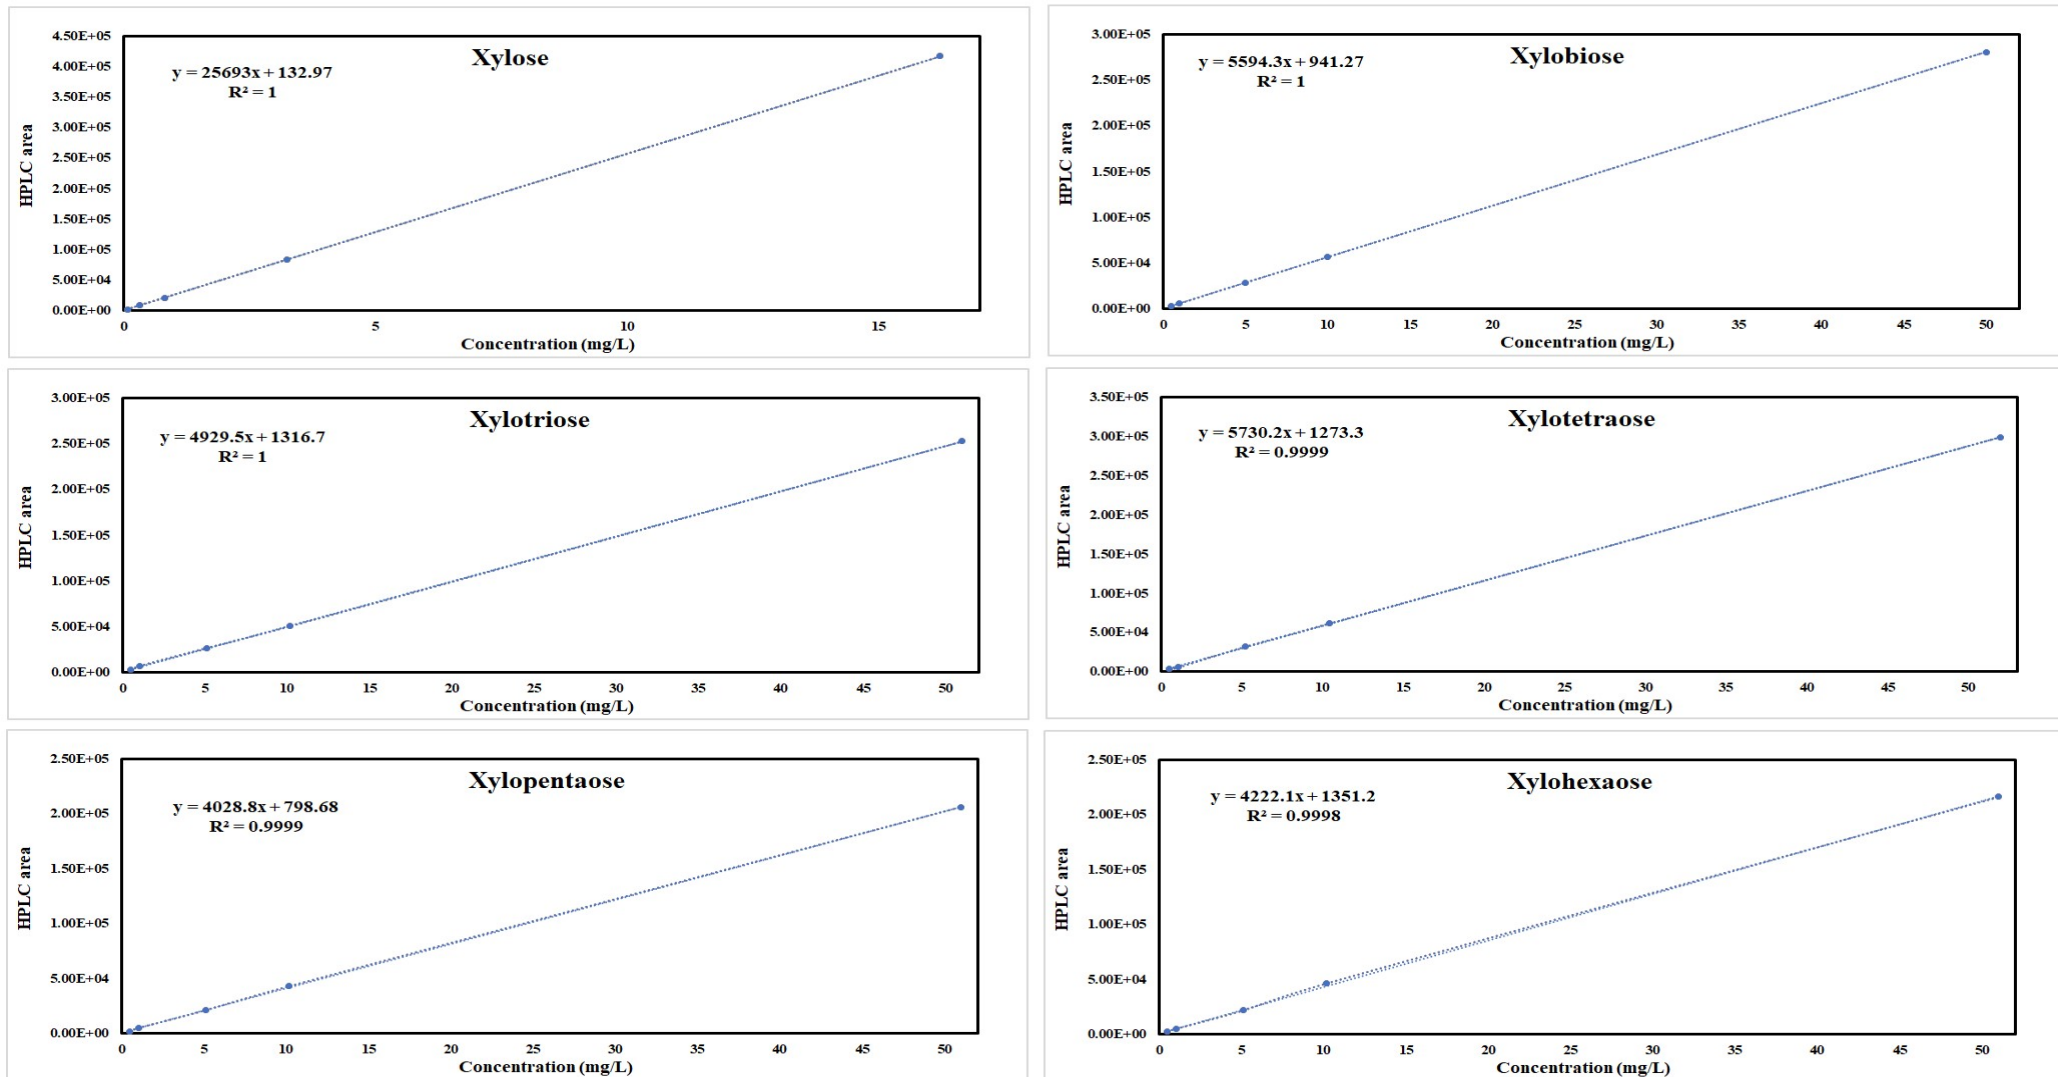

Fig. S7 HPLC calibration curve of X1, X2, X3, X4, X5, and X6 based on commercial standards.

## Hydrolysis of Solka Floc

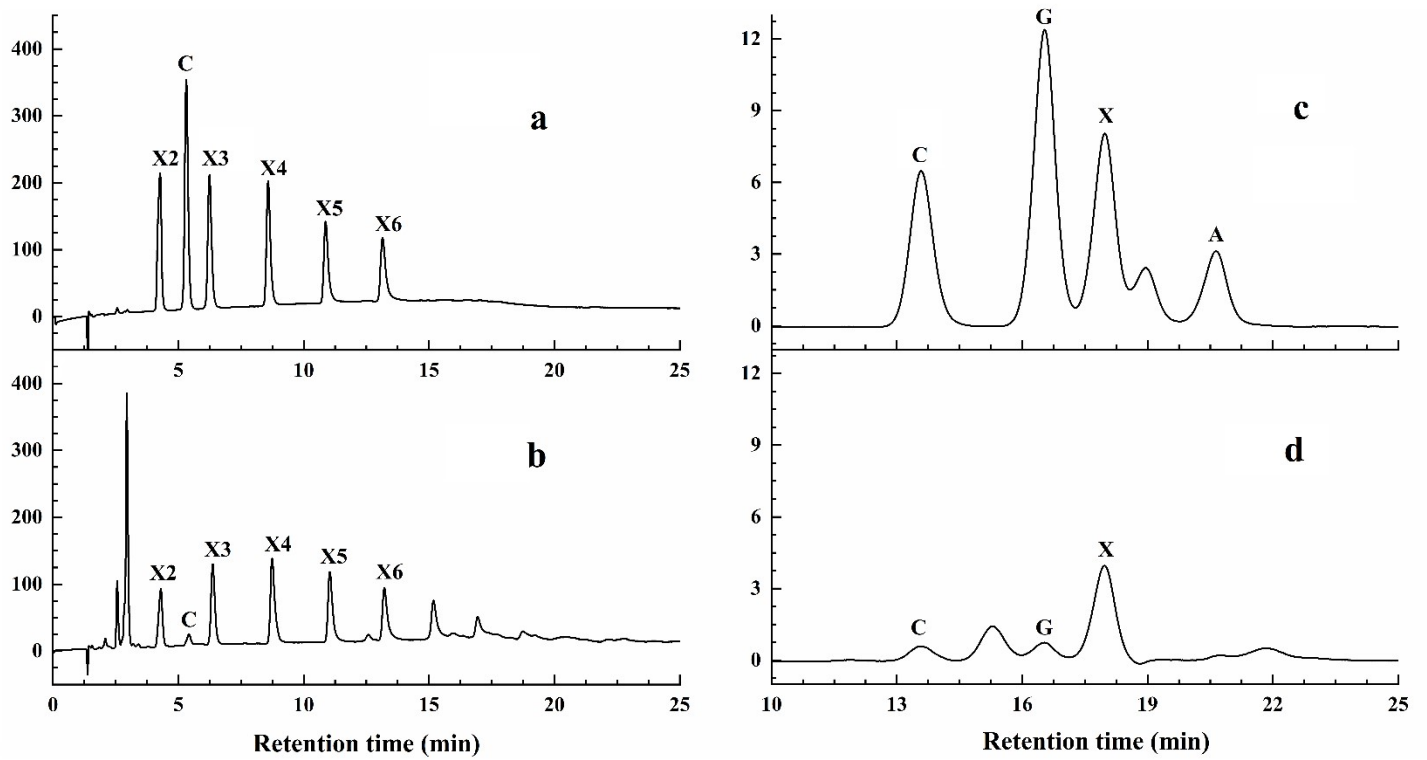

**Fig. S8** Typical HPLC chromatograms of (a) XOS standard, (b) XOS from hydrolyzed Solka Floc (c) sugar monomer standards, (d) sugars from hydrolyzed Solka Floc. The positions of xylose (X), glucose (G), arabinose (A); lower than detection limits), cellobiose (C), xylobiose (X2), xylotriose (X3), xylotetraose (X4), xylopentaose (X5), xylohexaose (X6), are shown.



**Table S1** The yields of xylose and xylooligosaccharides in the hydrolysate of Solka Floc.

| Catalyst   | Weight of catalyst (mg) | The yields of xylose and XOS (%) |           |            |              |               |              |           |                  |
|------------|-------------------------|----------------------------------|-----------|------------|--------------|---------------|--------------|-----------|------------------|
|            |                         | Xylose                           | Xylobiose | Xylotriose | Xylotetraose | Xylopentaoase | Xylohexaoase | Total XOS | Total conversion |
| AC Control | 5                       | ND                               | ND        | ND         | ND           | ND            | ND           | 0.0       | 0.0              |
|            | 15                      | ND                               | ND        | ND         | ND           | ND            | ND           | 0.0       | 0.0              |
|            | 30                      | ND                               | ND        | ND         | ND           | ND            | ND           | 0.0       | 0.0              |
|            | 50                      | ND                               | 0.7       | 0.3        | 0.2          | 0.2           | ND           | 1.4       | 1.4              |
|            | 100                     | ND                               | ND        | ND         | ND           | ND            | ND           | 0.0       | 0.0              |
| AC Acid    | 5                       | ND                               | 1.9       | 2.4        | 2.3          | 2.5           | 2.0          | 11.2      | 11.2             |
|            | 15                      | 21.0                             | 3.0       | 4.57       | 3.05         | ND            | 2.6          | 13.2      | 34.2             |
|            | 30                      | 12.4                             | 4.2       | 4.8        | 4.3          | 3.1           | 1.6          | 18.0      | 30.4             |
|            | 50                      | 11.3                             | 8.2       | 8.5        | 5.2          | 2.2           | 0.5          | 24.5      | 35.8             |
|            | 100                     | 10.9                             | 5.3       | 1.8        | 0.2          | ND            | ND           | 7.4       | 18.2             |
| AC-P5      | 5                       | ND                               | ND        | ND         | 0.1          | 0.2           | ND           | 0.3       | 0.3              |
|            | 15                      | ND                               | ND        | ND         | ND           | ND            | ND           | 0.0       | 0.0              |
|            | 30                      | ND                               | ND        | ND         | ND           | ND            | ND           | 0.0       | 0.0              |
|            | 50                      | ND                               | ND        | ND         | ND           | ND            | ND           | 0.0       | 0.0              |
|            | 100                     | ND                               | ND        | ND         | ND           | ND            | ND           | 0.0       | 0.0              |
| AC-P10     | 5                       | ND                               | ND        | ND         | 0.1          | 0.2           | ND           | 0.3       | 0.3              |
|            | 15                      | ND                               | ND        | ND         | ND           | ND            | ND           | 0.0       | 0.0              |
|            | 30                      | ND                               | ND        | ND         | ND           | ND            | ND           | 0.0       | 0.0              |
|            | 50                      | ND                               | 0.3       | ND         | ND           | ND            | ND           | 0.3       | 0.3              |
|            | 100                     | ND                               | ND        | ND         | ND           | ND            | ND           | 0.0       | 0.0              |
| AC-P20     | 5                       | ND                               | ND        | ND         | 0.1          | 0.1           | 0.2          | 0.4       | 0.4              |
|            | 15                      | ND                               | ND        | ND         | ND           | ND            | ND           | 0.0       | 0.0              |
|            | 30                      | ND                               | ND        | ND         | ND           | ND            | ND           | 0.0       | 0.0              |
|            | 50                      | ND                               | ND        | ND         | ND           | ND            | ND           | 0.0       | 0.0              |
|            | 100                     | ND                               | ND        | ND         | ND           | ND            | ND           | 0.0       | 0.0              |
| AC-P40     | 5                       | ND                               | ND        | ND         | 0.1          | 0.1           | 0.1          | 0.3       | 0.3              |
|            | 15                      | ND                               | ND        | ND         | ND           | ND            | ND           | 0.0       | 0.0              |
|            | 30                      | ND                               | 1.3       | 1.0        | 0.7          | 0.5           | 0.4          | 3.9       | 3.9              |
|            | 50                      | ND                               | ND        | ND         | ND           | ND            | ND           | 0.0       | 0.0              |
|            | 100                     | ND                               | ND        | ND         | ND           | ND            | ND           | 0.0       | 0.0              |
| AC-P5-A    | 5                       | ND                               | 3.6       | 4.8        | 4.5          | 5.0           | 1.3          | 19.2      | 19.2             |
|            | 15                      | 19.7                             | 4.8       | 6.1        | 5.8          | 6.0           | 4.7          | 27.4      | 47.1             |
|            | 30                      | 14.7                             | 12.9      | 10.4       | 6.0          | 2.2           | 4.6          | 36.1      | 50.8             |

|            |     |      |      |      |     |     |     |      |      |
|------------|-----|------|------|------|-----|-----|-----|------|------|
|            | 50  | 15.0 | 6.7  | 5.8  | 1.9 | 0.4 | 0.8 | 15.6 | 30.6 |
|            | 100 | 15.3 | 3.9  | 1.3  | 0.4 | ND  | ND  | 5.6  | 20.9 |
| AC-P10-A   | 5   | ND   | 4.6  | 6.3  | 6.0 | 6.3 | 2.1 | 25.2 | 25.2 |
|            | 15  | 10.1 | 9.8  | 10.2 | 8.6 | 5.3 | 4.2 | 38.1 | 48.3 |
|            | 30  | 18.3 | 14.4 | 10.6 | 5.2 | 1.7 | 4.5 | 36.3 | 54.6 |
|            | 50  | 21.7 | 15.4 | 8.2  | 3.5 | 0.3 | 0.4 | 27.7 | 49.4 |
|            | 100 | 20.7 | 10.5 | 2.3  | 0.5 | ND  | ND  | 13.2 | 34.0 |
| AC-P20-A   | 5   | 10.4 | 10.0 | 10.0 | 9.0 | 7.2 | 4.7 | 40.9 | 51.4 |
|            | 15  | 21.4 | 18.2 | 14.9 | 9.2 | 3.3 | 8.5 | 54.0 | 75.7 |
|            | 30  | 28.6 | 19.3 | 11.6 | 8.6 | 1.7 | 8.8 | 50.1 | 78.6 |
|            | 50  | 28.3 | 16.0 | 6.9  | 4.2 | 0.1 | 3.2 | 30.4 | 58.7 |
|            | 100 | 21.3 | 6.5  | 1.0  | 0.1 | 0.1 | ND  | 7.2  | 28.5 |
| AC-P40-A   | 5   | ND   | 4.3  | 4.9  | 5.0 | 5.5 | 4.6 | 24.2 | 24.2 |
|            | 15  | 12.1 | 9.6  | 9.1  | 7.5 | 5.2 | 2.1 | 33.4 | 45.5 |
|            | 30  | 13.7 | 9.6  | 7.9  | 3.7 | 1.1 | 2.1 | 24.4 | 38.2 |
|            | 50  | 14.9 | 9.0  | 4.0  | 0.8 | 0.2 | 1.0 | 15.1 | 29.9 |
|            | 100 | 11.9 | 4.0  | 0.6  | 0.1 | ND  | ND  | 4.8  | 16.6 |
| Only Water | 0   | ND   | 0.1  | 0.1  | 0.2 | 0.2 | 0.2 | 1.0  | 1.0  |

---

ND ≤ 0.1 %

arabinose was not detected.

100 mg of Solka Floc, 15 mg of catalysts—plasma treated, acid-treated, plasma-acid treated (AC-20P-A), untreated, and another batch without catalyst addition—10 mL of deionized water was loaded into a 100 mL glass tube reactor. The hydrolysis reactions were conducted at a temperature of 120 °C for 24 h.

**Table S2** The yields of xylose and xylooligosaccharides in the hydrolysate of Bagasse in 6 cycles.

| The yields of xylose and XOS (%) |            |            |            |              |              |             |            |                  |
|----------------------------------|------------|------------|------------|--------------|--------------|-------------|------------|------------------|
| Reusability                      | Xylose     | Xylobiose  | Xylotriose | Xylotetraose | Xylopentaose | Xylohexaose | Total XOS  | Total conversion |
| Cycle 1                          | 15.6 (1.3) | 14.1 (0.7) | 11.9 (0.2) | 8.8 (0.3)    | 9.1(0.4)     | 6.0 (0.3)   | 50.0 (1.9) | 65.6 (3.2)       |
| Cycle 2                          | 5.2 (0.5)  | 3.9 (0.1)  | 3.2 (0.1)  | 2.0 (0.1)    | 1.8 (0.1)    | 1.1 (0.0)   | 12.0 (0.5) | 17.2 (0.2)       |
| Cycle 3                          | 0.0 (0.0)  | 1.2 (0.0)  | 1.0 (0.0)  | 0.5 (0.0)    | 0.5 (0.0)    | 0.3 (0.0)   | 3.5 (0.0)  | 3.5 (0.0)        |
| Cycle 4                          | 0.0 (0.0)  | 0.5 (0.0)  | 0.5 (0.0)  | 0.3 (0.0)    | 0.3 (0.0)    | 0.2 (0.0)   | 1.7 (0.0)  | 1.7 (0.0)        |
| Cycle 5                          | 0.0 (0.0)  | 0.4 (0.0)  | 0.3 (0.0)  | 0.2 (0.0)    | 0.2 (0.0)    | 0.1 (0.0)   | 1.3 (0.1)  | 1.3 (0.1)        |
| Cycle 6                          | 0.0 (0.0)  | 0.3 (0.0)  | 0.3 (0.0)  | 0.2 (0.0)    | 0.2 (0.0)    | 0.1 (0.0)   | 1.1 (0.2)  | 1.1 (0.2)        |
| Total conversion<br>(C1 to C6)   |            |            |            |              |              |             | 69.6 (2.7) | 90.4 (3.7)       |

100 mg of bagasse (particle sizes of <0.125 mm), 15 mg of catalyst (AC-20P-A), and 10 mL of deionized water were loaded into a 100 mL glass tube reactor. The hydrolysis reactions were conducted at a temperature of 120 °C in 6 cycles (each cycle lasted 24 h).

FT-IR analysis

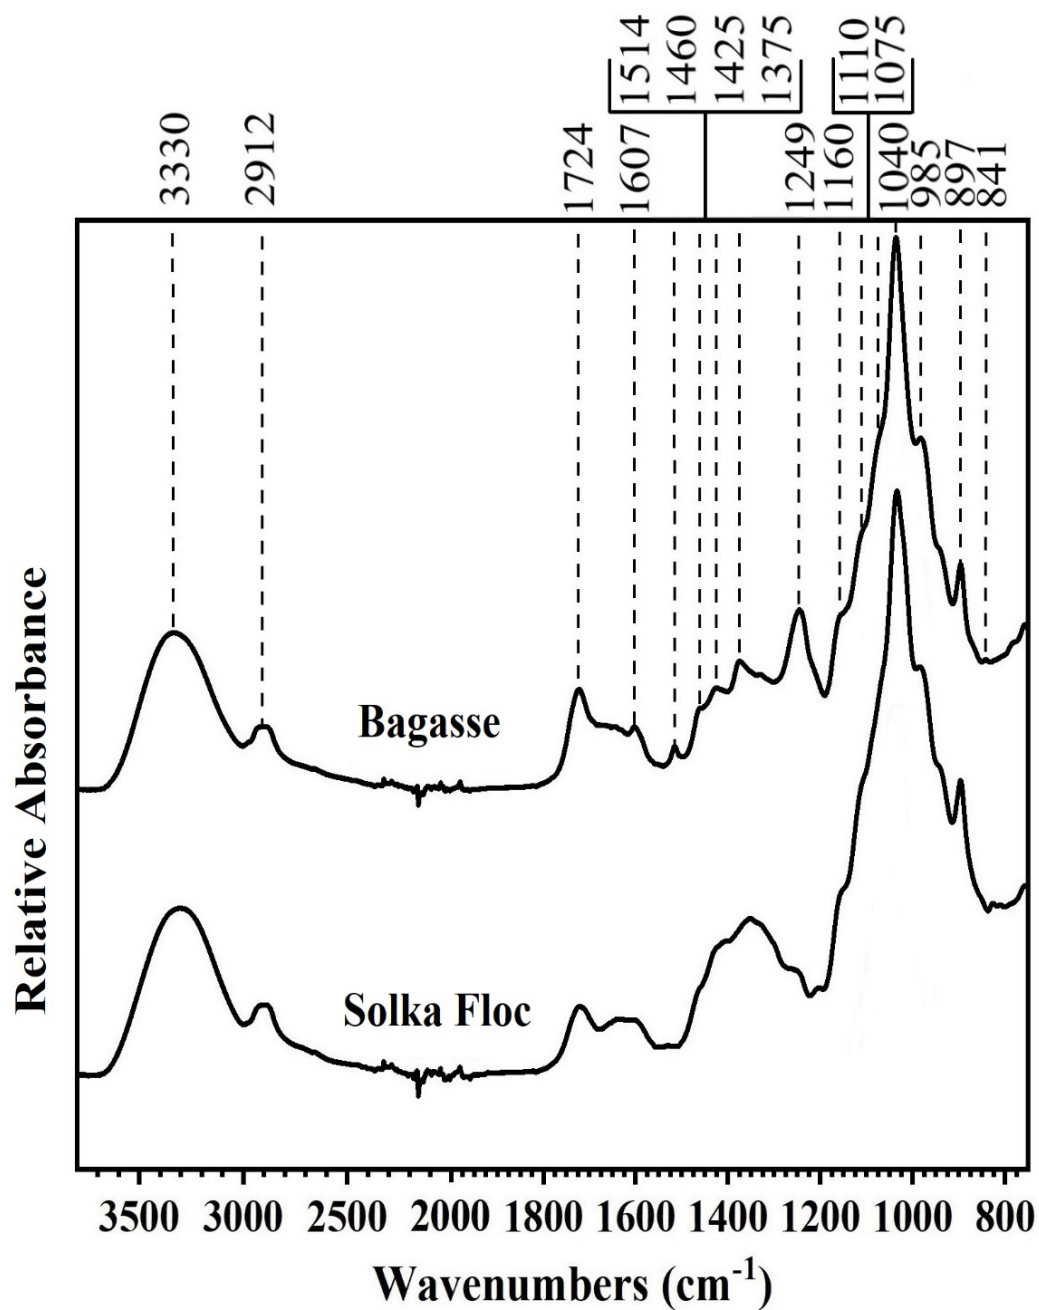

Fig. S9 FT-IR spectra of the hydrolyzed XOS using AC-20P-A catalysts for Solka Floc and sugarcane bagasse.



## HSQC NMR analysis

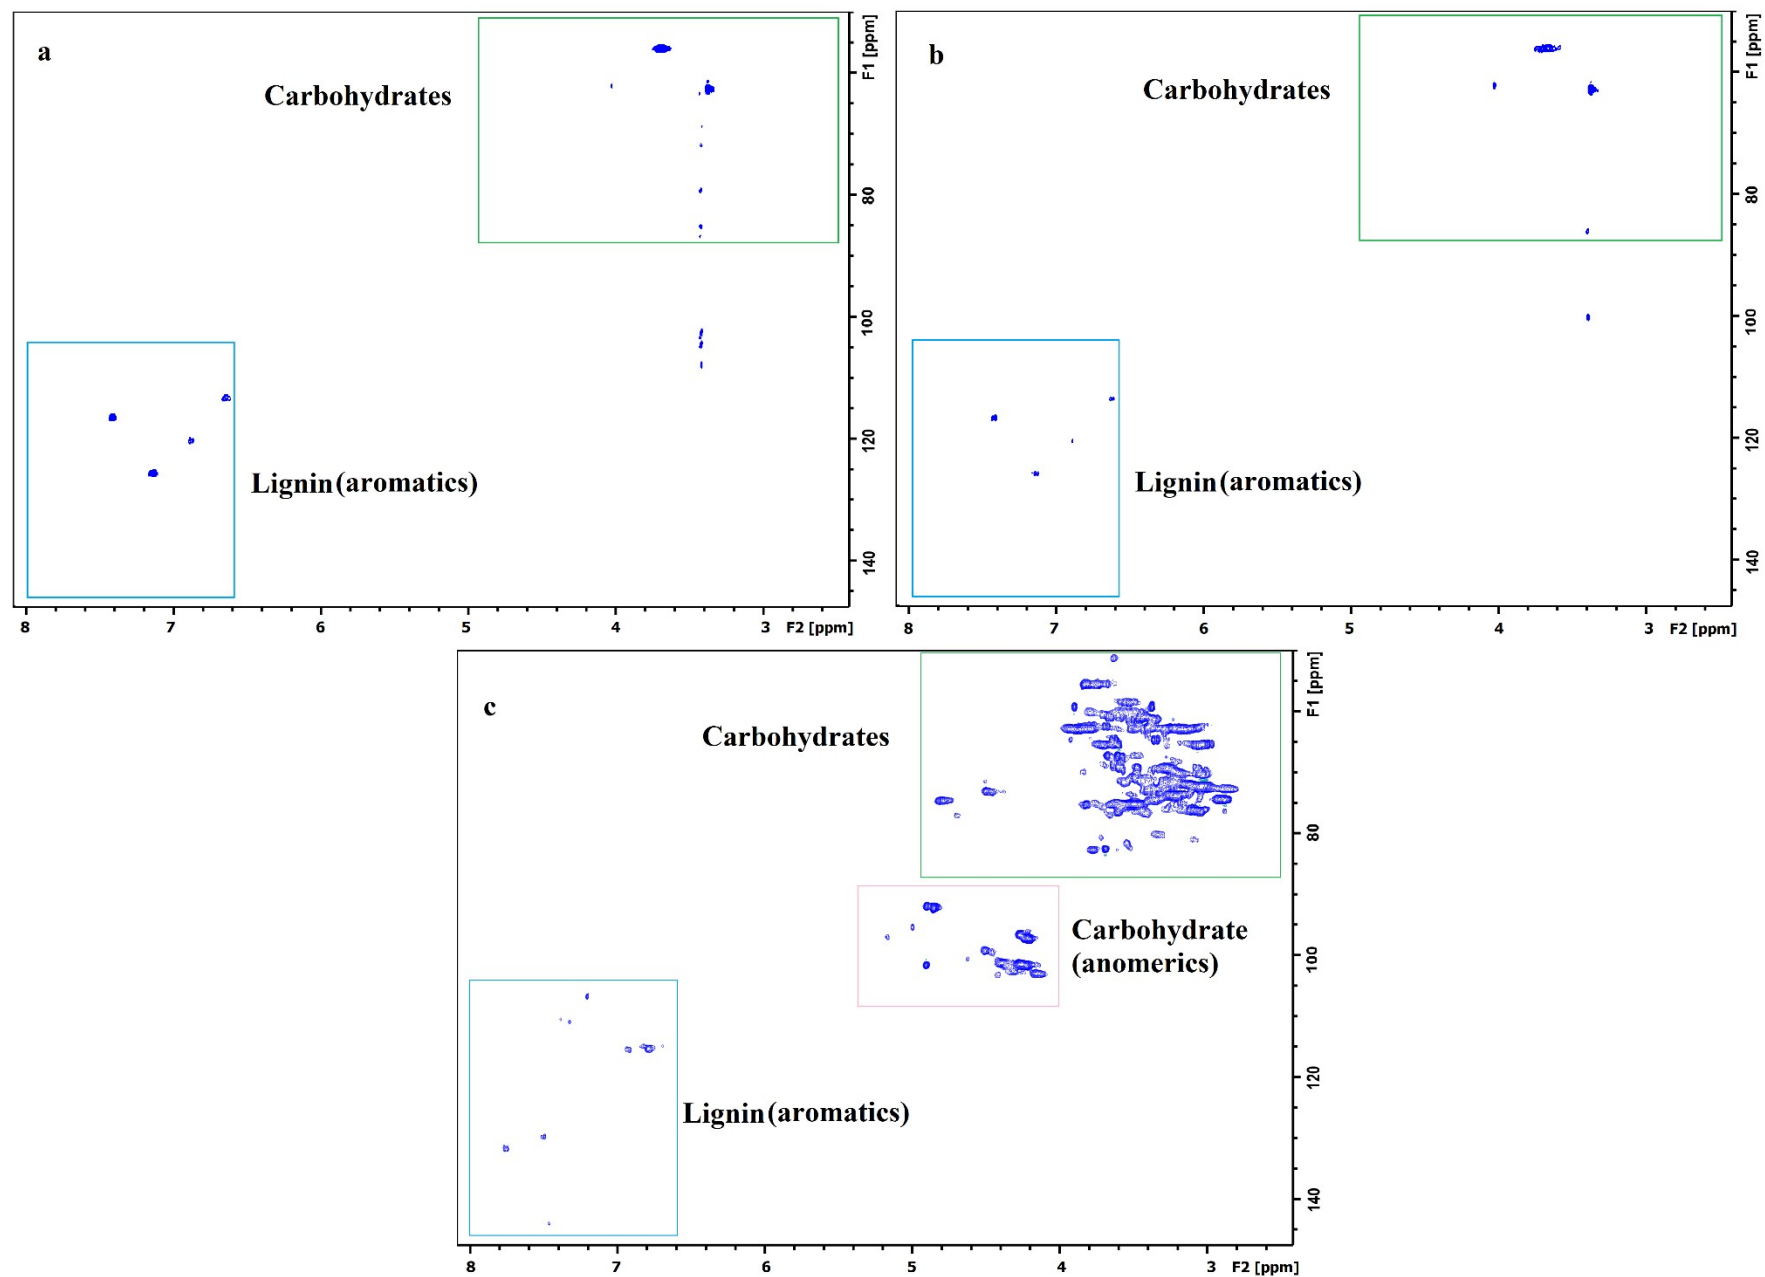

**Fig. S10** The overlay 2D  $^1\text{H}$ - $^{13}\text{C}$  HSQC spectra of (a) bagasse and (b) its residue after the hydrolysis reaction, and (c) the hydrolysate from bagasse hydrolysis.

**Table S3** Hydrolysis at different reaction times.

| Reaction time (h) | The yields of xylose and XOS (%) |           |            |              |              |             |      | Total XOS | Total conversion |
|-------------------|----------------------------------|-----------|------------|--------------|--------------|-------------|------|-----------|------------------|
|                   | Xylose                           | Xylobiose | Xylotriose | Xylotetraose | Xylopentaose | Xylohexaose |      |           |                  |
| 1                 | 0                                | 0.3       | 0.4        | 0.5          | 0.7          | 0.6         | 2.6  | 2.6       |                  |
| 3                 | 0                                | 1.0       | 1.3        | 1.5          | 2.2          | 1.8         | 7.7  | 7.7       |                  |
| 6                 | 0                                | 1.7       | 2.2        | 2.4          | 3.2          | 2.6         | 12.2 | 12.2      |                  |
| 12                | 0                                | 4.4       | 5.4        | 4.1          | 4.0          | 1.8         | 19.7 | 19.7      |                  |
| 18                | 16.0                             | 9.8       | 10.1       | 7.0          | 4.6          | 1.5         | 33.2 | 49.2      |                  |
| 24                | 21.7                             | 18.2      | 14.9       | 9.2          | 3.3          | 8.5         | 54.0 | 75.7      |                  |
| 30                | 25.9                             | 16.2      | 15.5       | 8.8          | 4.4          | 1.3         | 46.2 | 72.1      |                  |
| 36                | 30.6                             | 17.5      | 14.2       | 6.1          | 2.7          | 0.9         | 41.5 | 71.9      |                  |

100 mg of bagasse (particle sizes of <0.125 mm), 15 mg of catalyst (AC-20P-A), and 10 mL of deionized water were loaded into a 100 mL glass tube reactor. The hydrolysis reactions were conducted at a temperature of 120 °C for different reaction times (1–36 h).

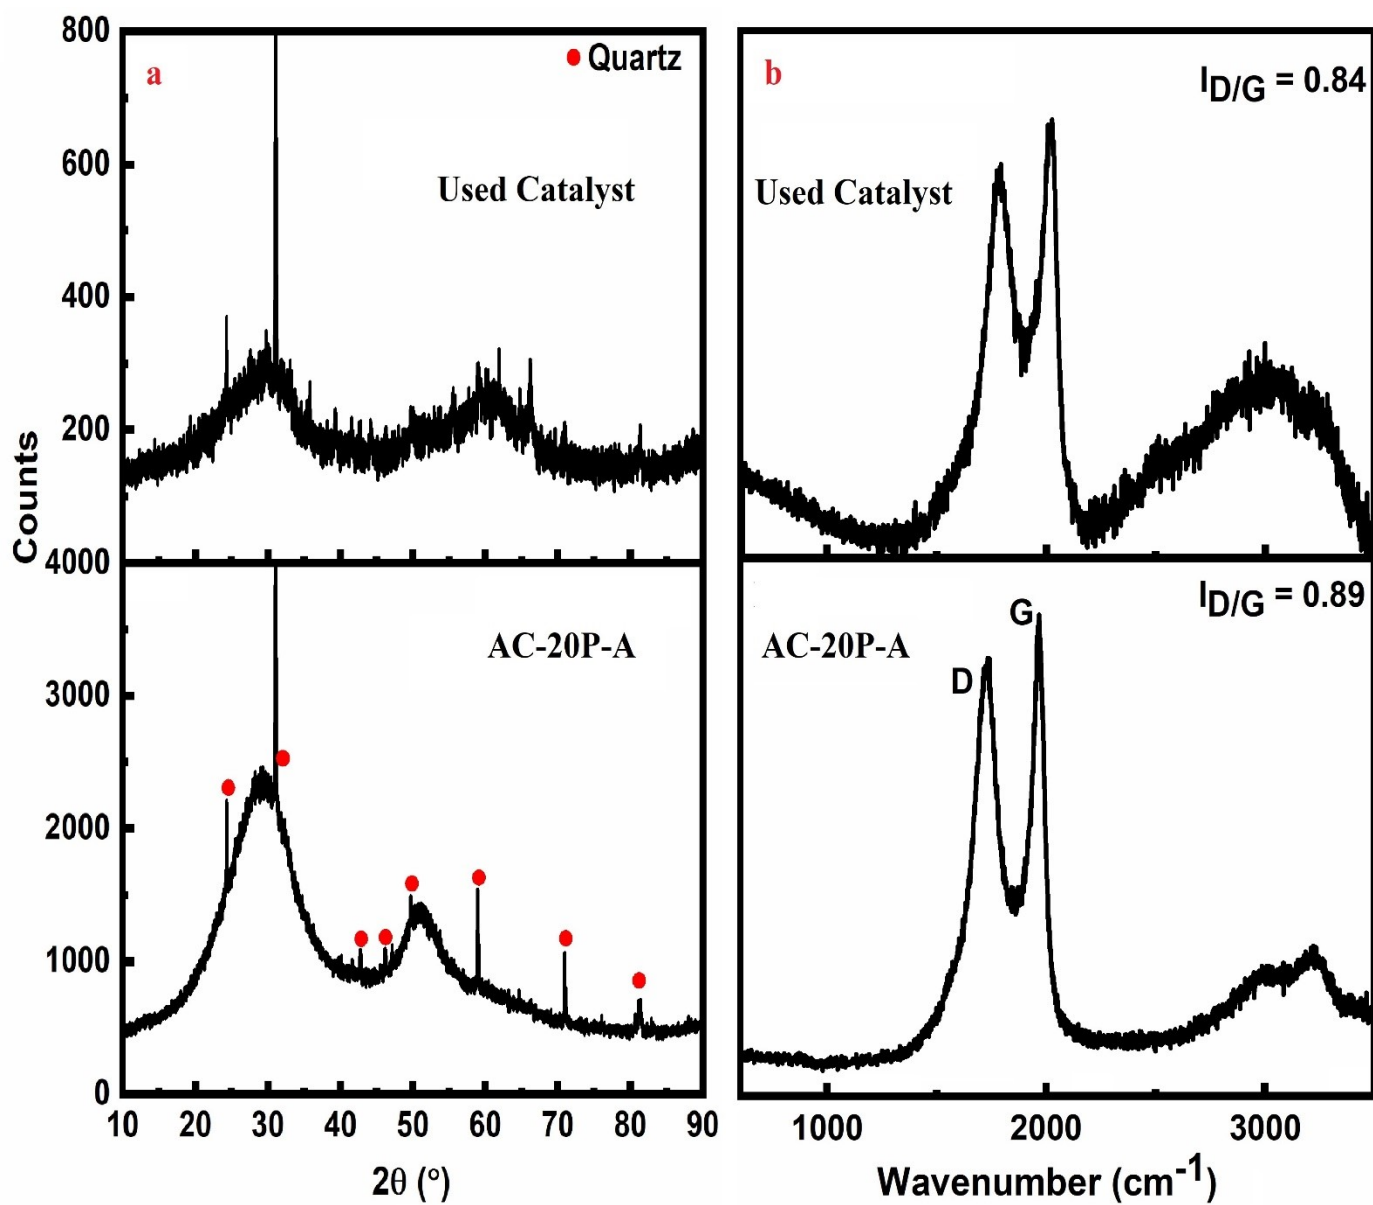

**Fig. S11** (a) Catalyst XRD patterns, and (b) Raman spectroscopy spectra of used and fresh catalyst (AC-20P-A).

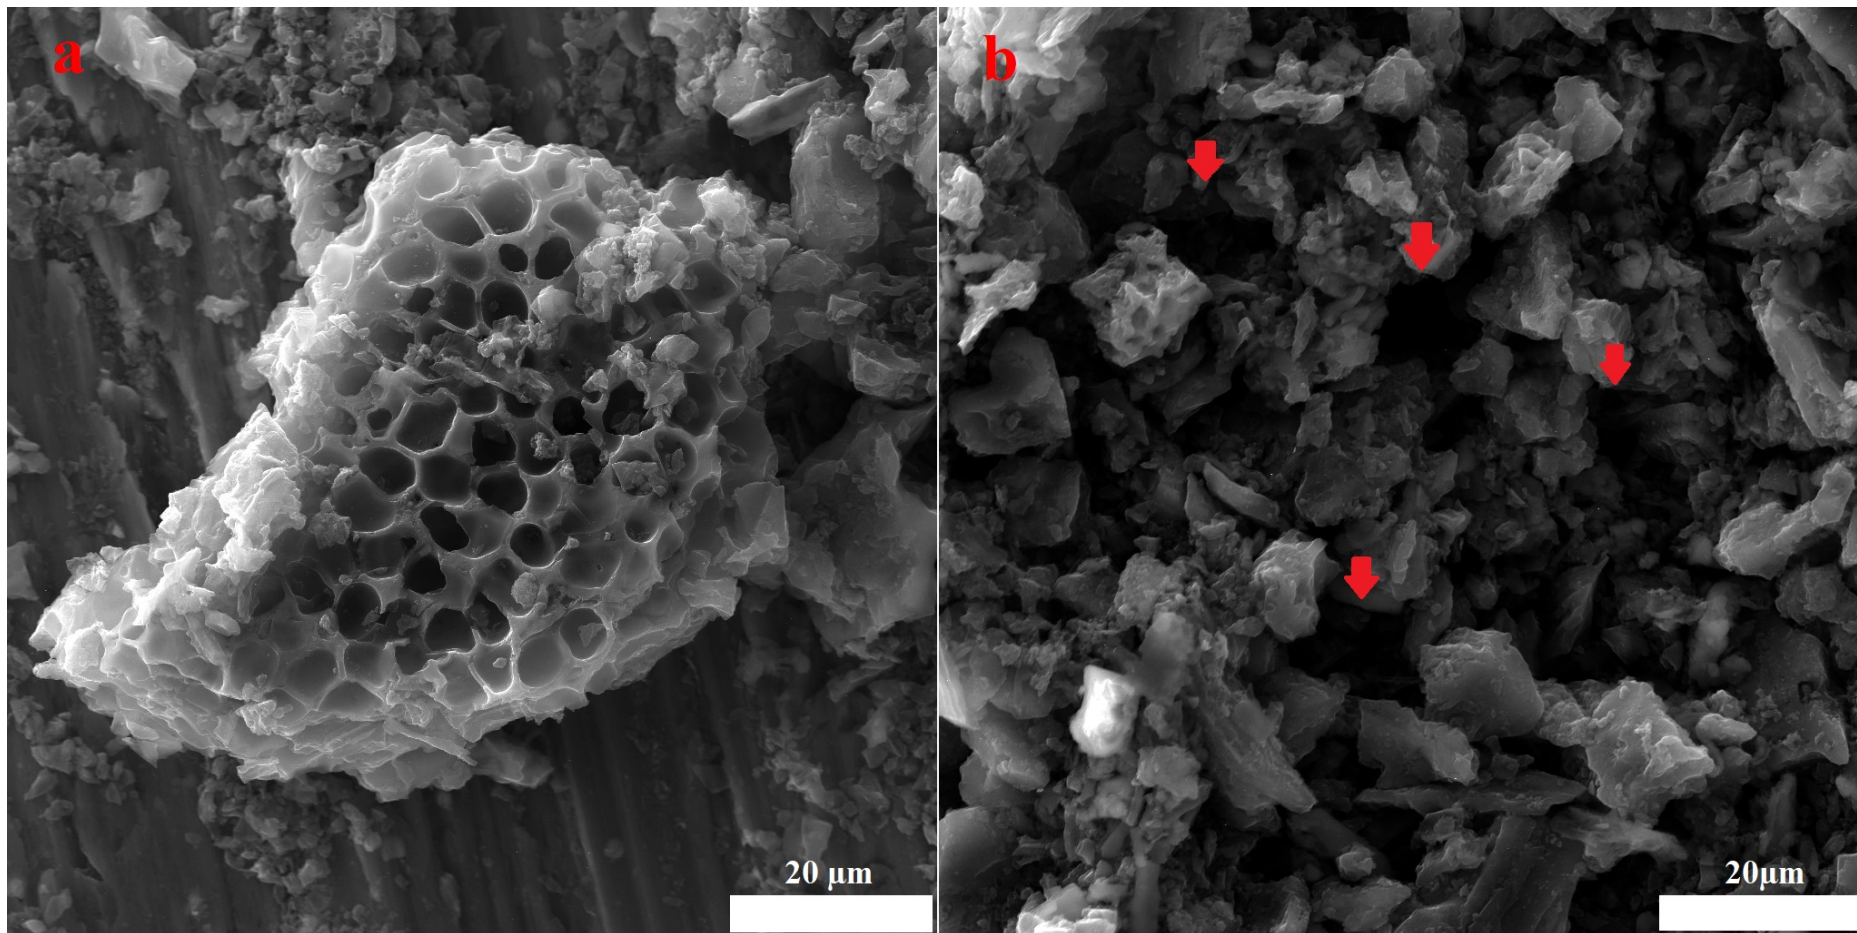

**Fig. S12** The SEM of AC-20P-A (a) fresh, and (b) used catalyst.



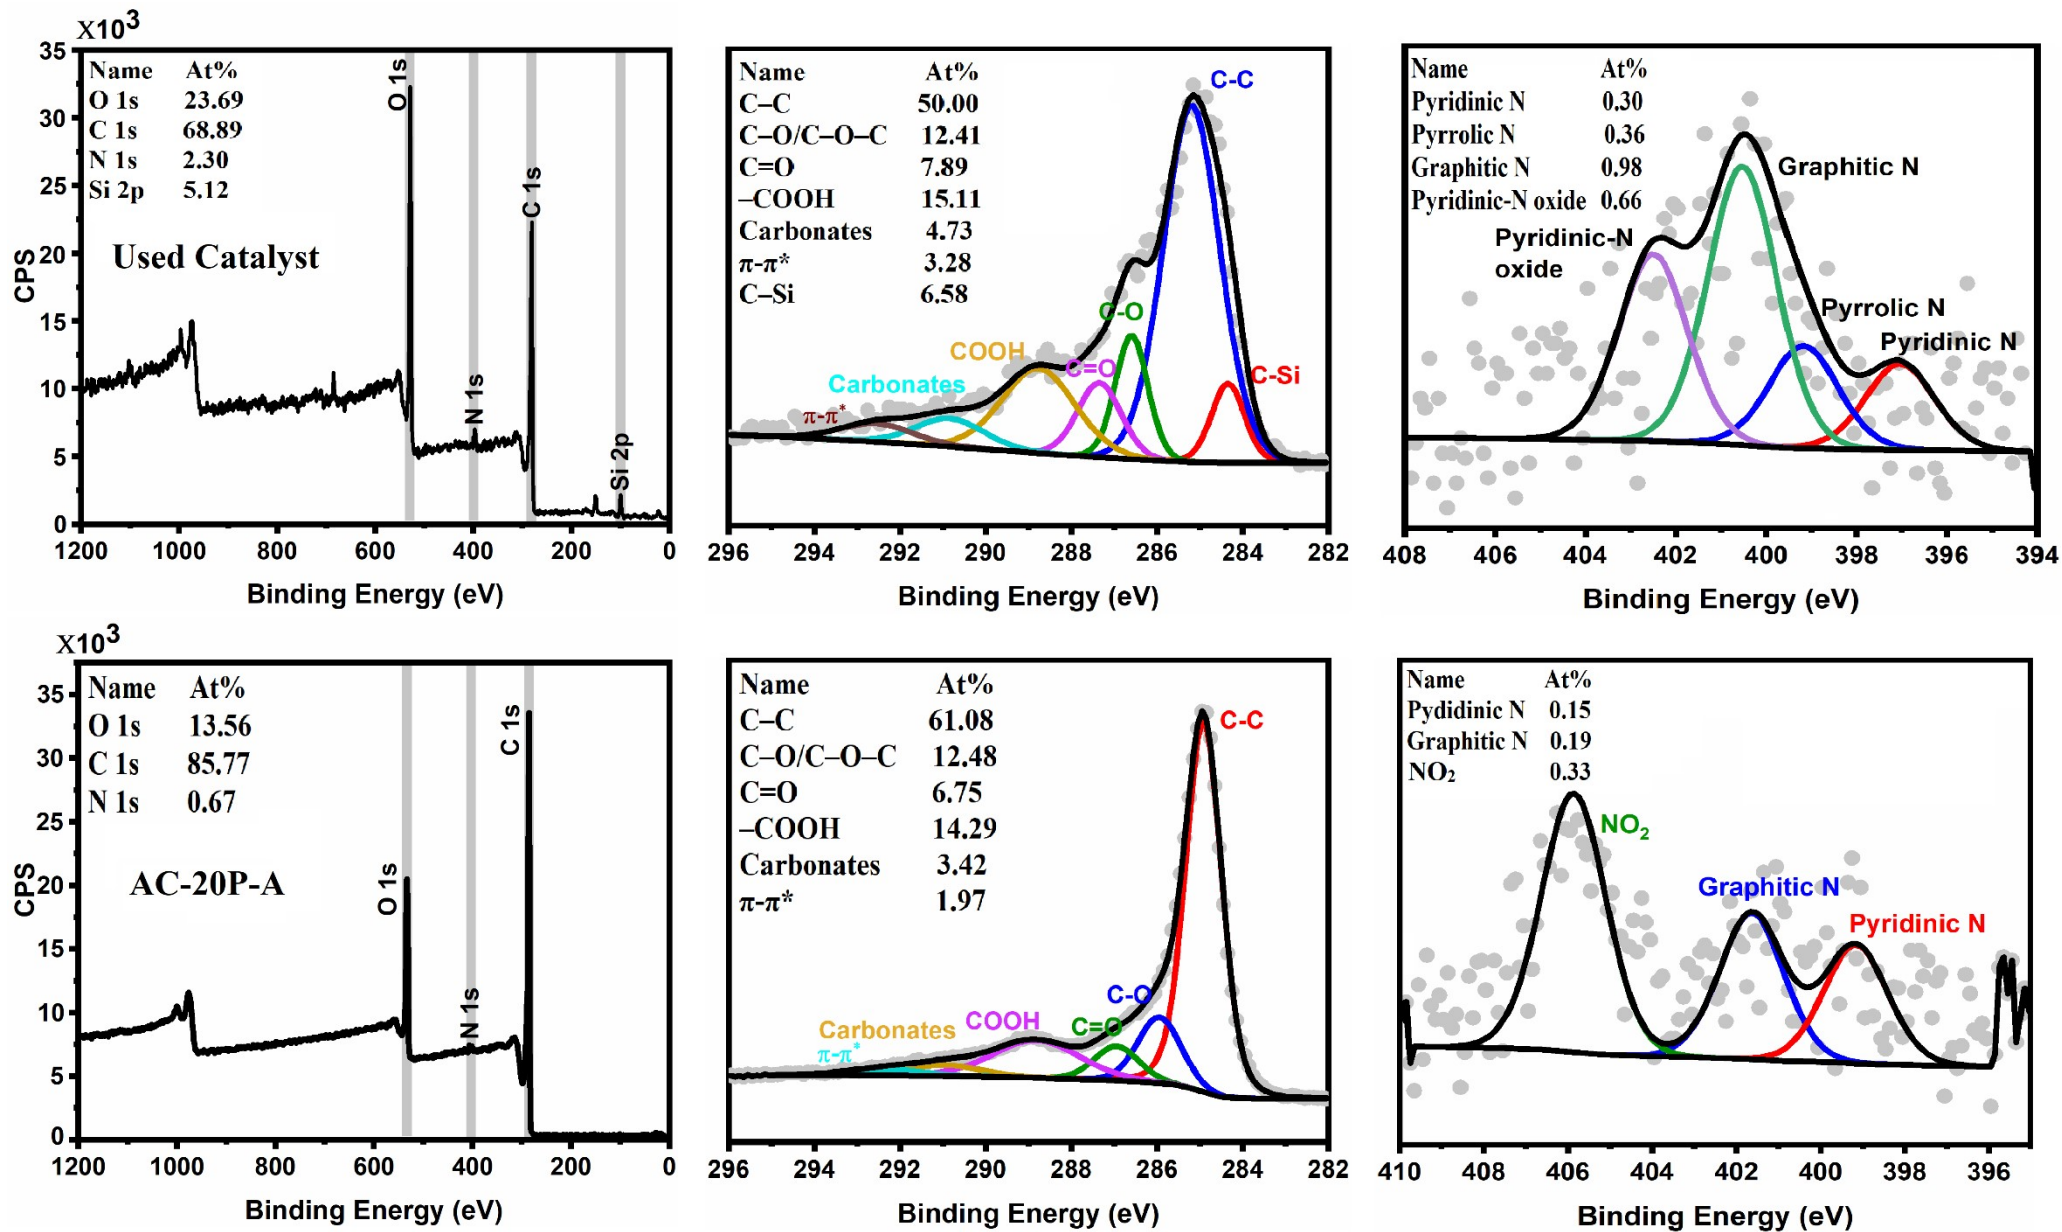

Fig. S13 The XPS of AC-20P-A (a) fresh, and (b) used catalyst.

**Table S4** SEM-EDX, elemental analysis of used catalyst.

|                           | <b>C</b> | <b>H</b> | <b>N</b> | <b>O</b> | <b>Si</b> |
|---------------------------|----------|----------|----------|----------|-----------|
| <b>SEM-EDX</b>            | 51.05    | -        | -        | 45.10    | 3.85      |
| <b>Elemental analysis</b> | 59.53    | 1.87     | 3.14     | 35.46    | -         |

Error in duplicate (<0.1 %)

## Boehm titration

The equation below was used to calculate the concentration of the surface functional groups:

$$n_{\text{CSF}} = [\text{B}] \times V_{\text{B}} - [\text{HCL}] \times V_{\text{HCL}} \times \frac{V_{\text{B}}}{V_{\text{a}}}$$

(1)

where [B] and  $V_{\text{B}}$  are the concentration and volume, respectively, of each aqueous solution (NaOH,  $\text{Na}_2\text{CO}_3$ , and  $\text{NaHCO}_3$ ) mixed with the AC samples to give the number of moles of NaOH,  $\text{Na}_2\text{CO}_3$ , and  $\text{NaHCO}_3$  that are required to react with the surface functionalities of the carbon surface.  $n_{\text{CSF}}$  refers to the total number of moles of the acid functional groups present on the carbon surface that reacted with NaOH,  $\text{Na}_2\text{CO}_3$ , and  $\text{NaHCO}_3$  individually during the mixing phase. The amount of the aliquot taken from  $V_{\text{B}}$  is referred to as  $V_{\text{a}}$ . Terms [HCl] and  $V_{\text{HCl}}$  are the concentration and volume, respectively, of acid, added to the aliquot of the initial sample. This gives the moles of acid added into the aliquot, free for reaction with the remaining base. The types of acid groups were calculated on the basis that all surface groups (carboxylic, lactonic, and phenolic groups) were neutralized by NaOH; carboxylic and lactonic groups were neutralized by  $\text{Na}_2\text{CO}_3$ , and carboxylic groups were neutralized by  $\text{NaHCO}_3$ . The number of phenols on the surface is calculated by taking the difference between the measured  $n_{\text{CSF}}$  of NaOH and  $\text{Na}_2\text{CO}_3$ . Likewise, the number of lactonic groups is the difference between  $\text{Na}_2\text{CO}_3$  and  $\text{NaHCO}_3$  and the  $n_{\text{CSF}}$  measured from  $\text{NaHCO}_3$  is the number of carboxylic acid groups.

## Product analysis of the monomers, oligomers, and degradation products

A Waters High Performance Liquid Chromatography (HPLC) instrument with an electrochemical detector (Waters 2465), pump, and auto sampling system (Waters e2695, US), as well as a Dionex CarboPac™ PA-100 column (BioLC™ 4×250 mm, Thermo Scientific, US), were used to quantify xylose oligomers (xylobiose, xylotriose, xylotetraose, xylopentaose, and xylohexaose) in the reaction solution. A mixture of solvent A (150 mM NaOH) and solvent B (150 mM sodium acetate and 150 mM NaOH) were used as the mobile phases. The gradient method according to Curve 6 (detection waveform from Dionex Technical Note 21 (Thermo Scientific, US)) was applied to the column at 30 °C with a flow rate of 1 mL min<sup>-1</sup>. The gradient method started (0–1 min) with 86.7 % solvent A and 13.3 % solvent B. Over 1–30 min, the A to B volume ratio was changed to 0 %: 100 %, then to 86.7 %: 13.3 % over 30–32 min, and then at this ratio over 32–40 min. A Waters HPLC with an RPM monosaccharide column (300 mm × 8.0 mm, Phenomenex, Australia), a pump (Waters 1515, US), a refractive index (RI) detector (Waters 410, US), and an autosampler (Waters 2707, US), were used to determine the monosaccharides in the reaction solution. The RPM column was heated to 85 °C, and the mobile phase was water, flowing at 0.5 mL min<sup>-1</sup>. A Waters HPLC system with an Aminex HPX-87H column (300 mm × 8.0 mm, Bio-Rad, US), an integrated pump and auto sampling system (Waters e2695, US), an RI detector (Waters 410, US), and a dual-wavelength UV absorbance detector (Waters 2487, US), was used to measure sugar degradation products (*i.e.*, furfural, 5-hydroxymethylfurfural (HMF) and organic acids such as levulinic acid or formic acid) in the reaction solution. The mobile phase was 5 mM H<sub>2</sub>SO<sub>4</sub> with a 0.5 mL min<sup>-1</sup> flow rate and a column temperature of 65 °C.

The xylose, XOS yield was calculated according to the following equations.

$$\text{Xylose yield (\%)} = \frac{\text{xylose [g] in supernatants}}{\text{xylan [g] in raw material}} \times 100$$

(2)



$$\text{XOS yield (\%)} = \frac{\text{sum of all XOS in supernatants (DP 2 - 6)[g]}}{\text{xylan [g] in raw material}} \times 100$$

(3)

$$\text{Individual XOS (X2 - X6) yield (\%)} = \frac{\text{Individual XOS (X2 - X6)[g] in supernatants}}{\text{xylan [g] in raw material}} \times 100$$

(4)

## References

1. Sreńscek-Nazzal, J., et al., *Modification of Commercial Activated Carbons for CO<sub>2</sub> Adsorption*. J Acta Physica Polonica, A., 2016. **129**(3).
